# Supplementary material for: Preparation and pH Controlled Release of Fe3O4/Anthocyanin Magnetic Biocomposites
Source: MDPI journal article supplement (doi:10.3390/polym11122077), 2019-12-12
Supplement: s1 [file s1]

*Supporting information*

*for*

Preparation and pH controlled release of Fe<sub>3</sub>O<sub>4</sub>/anthocyanin  
magnetic biocomposites

*Xizhi Jiang*<sup>1,2,3</sup>, *Qingbao Guan*<sup>4</sup>, *Min Feng*<sup>2,3</sup>, *Mengyang Wang*<sup>2,3</sup>, *Nina Yan*<sup>2,3</sup>, *Min Wang*<sup>2,3</sup>, *Lei Xu*<sup>2,3,\*</sup> and *Zhongzheng Gui*<sup>1,\*</sup>

<sup>1</sup> School of Biotechnology, Jiangsu University of Science and Technology, Zhenjiang 212018, Jiangsu, China

<sup>2</sup> Institute of Agricultural Facilities and Equipment, Jiangsu Academy of Agricultural Sciences, Nanjing 210014, Jiangsu, China

<sup>3</sup> Key Laboratory for Protected Agricultural Engineering in the Middle and Lower Reaches of Yangtze River, Ministry of Agriculture and Rural Affairs, Nanjing 210014, Jiangsu, China

<sup>4</sup> State Key Laboratory for Modification of Chemical Fibers and Polymer Materials, International Joint Laboratory for Advanced Fiber and Low-dimension Materials, College of Materials Science and Engineering, Donghua University, Shanghai, 201620, China

*\* Corresponding Authors*

*E-mail: [xulei@jaas.ac.cn](mailto:xulei@jaas.ac.cn) (L. Xu); [srizzgui@hotmail.com](mailto:srizzgui@hotmail.com) (Z. Gui)*

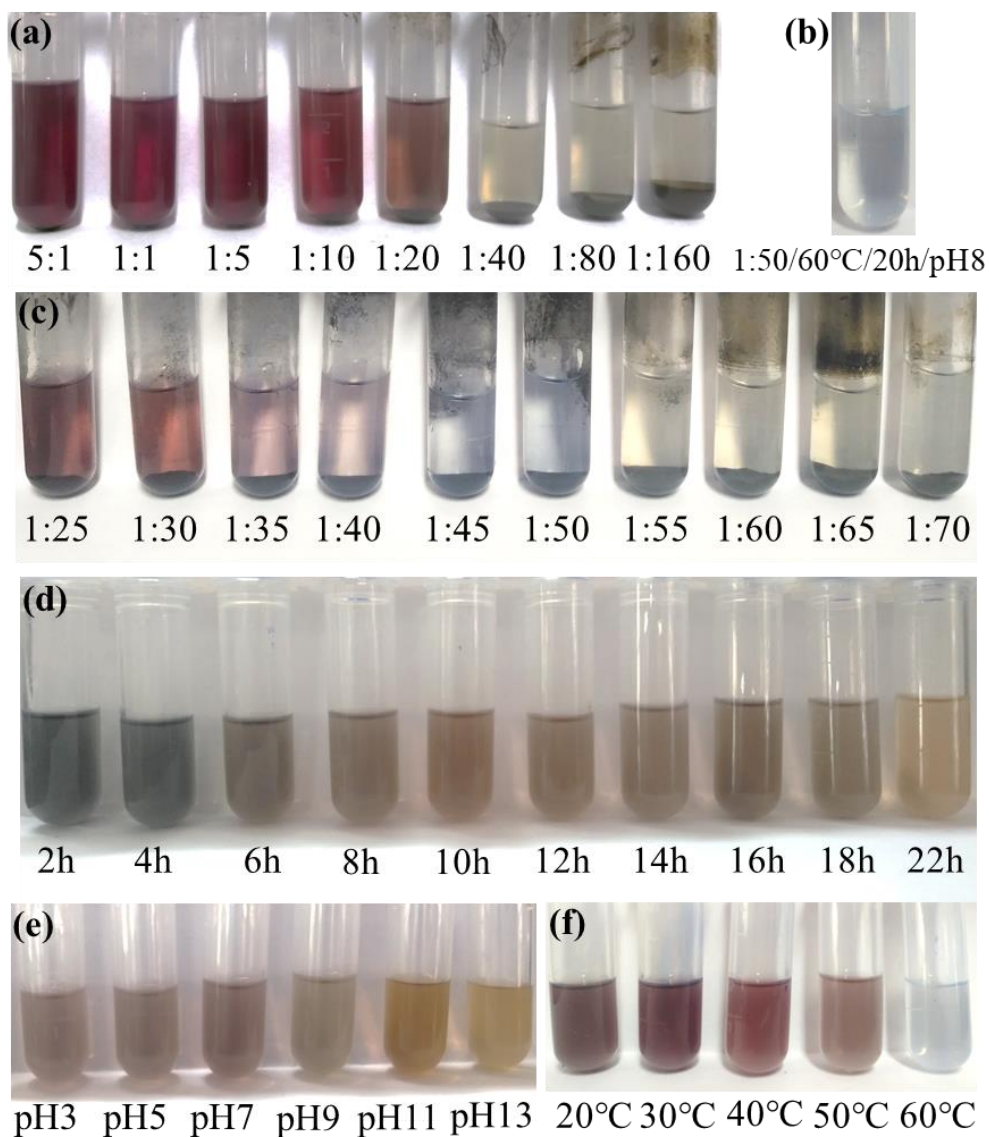

**Figure S1.** The images of optimized synthesis conditions of  $\text{Fe}_3\text{O}_4$ /anthocyanin magnetic biocomposite. (a) Anthocyanin and  $\text{Fe}_3\text{O}_4$  with different mass ratios of 5:1, 1:1, 1:5, 1:10, 1:20, 1:40, 1:80; (b) The optimum synthesis conditions of  $\text{Fe}_3\text{O}_4$ /anthocyanin magnetic biocomposite; (c) Anthocyanin and  $\text{Fe}_3\text{O}_4$  with different mass ratios of 1:25, 1:30, 1:35, 1:40, 1:45, 1:50, 1:55, 1:60, 1:65, 1:70; (d) Different reaction times of 2, 4, 6, 8, 10, 12, 14, 16, 18, 22 h; (e) Different pH of 3, 5, 7, 9, 11, 13; (f) Different reaction temperatures of 20, 30, 40, 50, 60 °C.

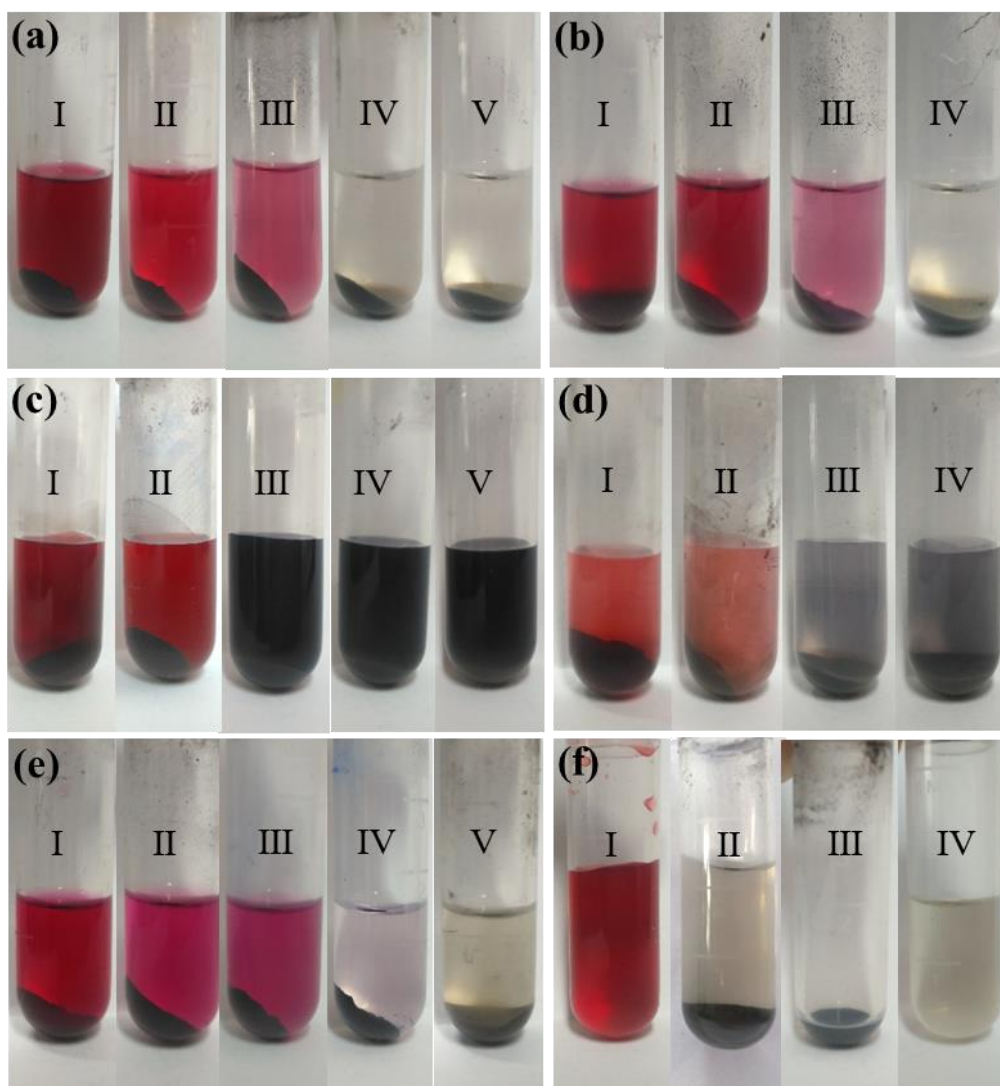

**Figure S2.** The images of release conditions of anthocyanin. (a) Primary release in different methanol solutions (pH 1.0, 1.6, 2.0, 3.0 and original methanol solution); (b) Secondary release in different methanol solutions (pH 1.0, 1.6, 2.0, 3.0); (c) Primary release in different deionized water solutions (pH 1.0, 1.6, 2.0, 3.0 and deionized water solution); (d) Secondary release in different deionized water solutions (pH of 1.0, 1.6, 2.0, 3.0); (e) Primary release in different ethanol solutions (pH 1.0, 1.6, 2.0, 3.0 and original ethanol solution); (f) Anthocyanin solution,  $\text{Fe}_3\text{O}_4$ /anthocyanin magnetic biocomposites, separated  $\text{Fe}_3\text{O}_4$ /anthocyanin solid, supernatant, respectively.

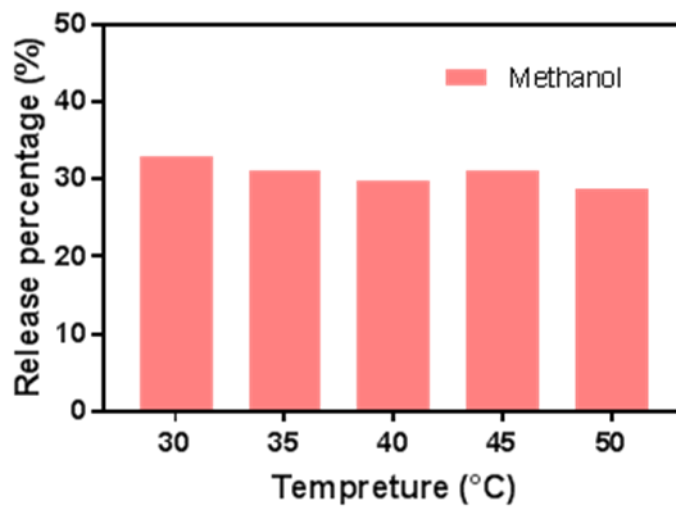

**Figure S3.** Release percentages of anthocyanin from  $\text{Fe}_3\text{O}_4$ /anthocyanin magnetic biocomposites at different temperatures

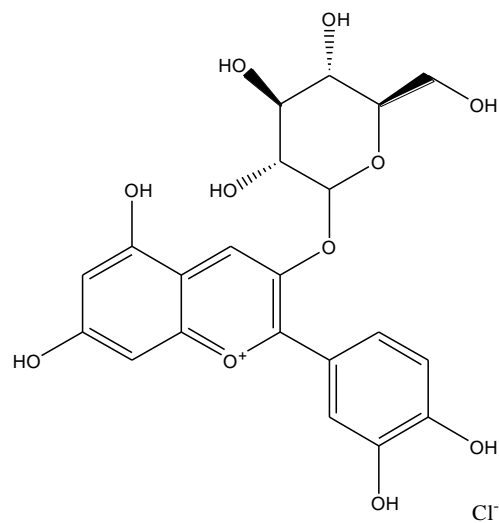

**Figure S4.** The structure of cyanidin-3-O-glucoside standard
